# Supplementary material for: RNA-Seq Transcriptome Analysis of Peripheral Blood From Cattle Infected With Mycobacterium bovis Across an Experimental Time Course
Source: Front Vet Sci. 2021 May 28;8:662002. doi: 10.3389/fvets.2021.662002 (PMC8193354; doi:10.3389/fvets.2021.662002)
Supplement: Supplementary file 2 [file Data_Sheet_2.XLSX]

## Sheet: Table S1
Table S1: Animal infection time course sample information with total RNA sample quality and quantity data and RNA-seq library pool and barcode index information.
Sample number	Animal identifier	Lab code	Experimental group	Infection time point	RNA quantity (ng/µl	Sample conc. (nM)	Sample RIN	RNA-seq library sample pool	Library barcode index number	Library barcode index sequence	Comments
1	6511	1.2.F	Ex vivo	-1 wk	3.51	16.6409	9.4	Pool 1	Index 1	ATCACG
2	6511	1.3.F	Ex vivo	+1 wk	3.97	18.8218	9.2	Pool 1	Index 2	CGATGT
3	6511	1.4.F	Ex vivo	+2 wk	5.2	24.6532	9	Pool 1	Index 3	TTAGGC
4	6511	1.5.F	Ex vivo	+6 wk	7.04	33.3766	9.4	Pool 1	Index 4	TGACCA
5	6511	1.6.F	Ex vivo	+10 wk	3.8	18.0158	9.6	Pool 1	Index 5	ACAGTG
6	6511	1.7.F	Ex vivo	+12 wk	5.77	27.3556	9.2	Pool 1	Index 6	GCCAAT
7	6514	2.2.F	Ex vivo	-1 wk	3.06	14.51	8.8	Pool 1	Index 7	CAGATC
8	6514	2.3.F	Ex vivo	+1 wk	3.24	15.3608	9	Pool 1	Index 8	ACTTGA
9	6514	2.4.F	Ex vivo	+2 wk	8.77	41.5786	9.4	Pool 1	Index 9	GATCAG
10	6514	2.5.F	Ex vivo	+6 wk	2.23	10.5724	7.4	Pool 1	Index 10	TAGCTT
11	6514	2.6.F	Ex vivo	+10 wk	5.52	26.1703	8	Pool 1	Index 11	GGCTAC
12	6514	2.7.F	Ex vivo	+12 wk	5.36	25.4118	8.2	Pool 1	Index 12	CTTGTA
13	6520	3.2.F	Ex vivo	-1 wk	10.06	47.6945	9.1	Pool 1	Index 13	AGTCAA
14	6520	3.3.F	Ex vivo	+1 wk	8.93	42.3371	8.7	Pool 1	Index 14	AGTTCC
15	6520	3.4.F	Ex vivo	+2 wk	---	---	---	---	---	---	Did not have measurable quantities of RNA
16	6520	3.5.F	Ex vivo	+6 wk	12.74	60.4003	9.3	Pool 1	Index 15	ATGTCA
17	6520	3.6.F	Ex vivo	+10 wk	10.5	49.7805	9.2	Pool 1	Index 16	CCGTCC
18	6520	3.7.F	Ex vivo	+12 wk	11.84	56.1334	8.9	Pool 1	Index 17	GTAGAG
19	6522	4.2.F	Ex vivo	-1 wk	2.2	10.43	9.4	Pool 1	Index 19	GTGAAA	Removed from analysis
20	6522	4.3.F	Ex vivo	+1 wk	4.76	22.5672	9.2	Pool 1	Index 20	GTGGCC	Removed from analysis
21	6522	4.4.F	Ex vivo	+2 wk	---	---	---	---	---	---	Did not have measurable quantities of RNA
22	6522	4.5.F	Ex vivo	+6 wk	7.62	36.1264	4.5	Pool 1	Index 22	CGTACG	Removed from analysis
23	6522	4.6.F	Ex vivo	+10 wk	6.18	29.2994	9.1	Pool 1	Index 23	GAGTGG	Removed from analysis
24	6522	4.7.F	Ex vivo	+12 wk	6.23	29.5364	9	Pool 1	Index 30	CACCGG	Removed from analysis
25	6526	5.2.F	Ex vivo	-1 wk	9.39	44.518	9.2	Pool 1	Index 31	CACGAT
26	6526	5.3.F	Ex vivo	+1 wk	10.37	49.1642	8.9	Pool 1	Index 46	TCCCGA
27	6526	5.4.F	Ex vivo	+2 wk	---	---	---	---	---	---	Did not have measurable quantities of RNA
28	6526	5.5.F	Ex vivo	+6 wk	8.85	41.9578	9.5	Pool 1	Index 18	GTCCGC
29	6526	5.6.F	Ex vivo	+10 wk	9.97	47.2678	9.3	Pool 1	Index 25	ACTGAT
30	6526	5.7.F	Ex vivo	+12 wk	7.62	36.1264	8.7	Pool 1	Index 27	ATTCCT
31	6635	6.3.F	Ex vivo	-1 wk	11.22	53.194	9.1	Pool 1	Index 29	CAACTA
32	6635	6.5.F	Ex vivo	+1 wk	10.69	50.6813	7.8	Pool 1	Index 33	CAGGCG
33	6635	6.6.F	Ex vivo	+2 wk	7.52	35.6523	8.9	Pool 1	Index 35	CATTTT
34	6635	6.7.F	Ex vivo	+6 wk	9.61	45.561	9.1	Pool 1	Index 37	CGGAAT
35	6635	6.8.F	Ex vivo	+10 wk	13.45	63.7664	8.9	Pool 1	Index 39	CTATAC
36	6635	6.9.F	Ex vivo	+12 wk	6.11	28.9675	9.2	Pool 1	Index 41	GACGAC
37	6636	7.3.F	Ex vivo	-1 wk	5.02	23.7998	9	Pool 1	Index 43	TACAGC
38	6636	7.5.F	Ex vivo	+1 wk	8.73	41.3889	9.4	Pool 1	Index 45	TCATTC
39	6636	7.6.F	Ex vivo	+2 wk	12.96	61.4434	9.2	Pool 1	Index 47	TCGAAG
40	6636	7.7.F	Ex vivo	+6 wk	8.68	41.1519	9.3	Pool 1	Index 21	GTTTCG
41	6636	7.8.F	Ex vivo	+10 wk	13.43	63.6716	9.8	Pool 1	Index 24	GGTAGC
42	6636	7.9.F	Ex vivo	+12 wk	14.55	68.9815	8	Pool 1	Index 26	ATGAGC
43	6637	8.3.F	Ex vivo	-1 wk	4.36	20.6708	8.4	Pool 1	Index 28	CAAAAG
44	6637	8.5.F	Ex vivo	+1 wk	9.09	43.0957	9.1	Pool 1	Index 32	CACTCA
45	6637	8.6.F	Ex vivo	+2 wk	14.81	70.2142	8.8	Pool 1	Index 34	CATGGC
46	6637	8.7.F	Ex vivo	+6 wk	9.09	43.0957	9.2	Pool 1	Index 36	CCAACA
47	6637	8.8.F	Ex vivo	+10 wk	9.84	46.6514	8.8	Pool 1	Index 38	CTAGCT
48	6637	8.9.F	Ex vivo	+12 wk	3.4	16.1194	9	Pool 1	Index 40	CTCAGA
49	6644	9.3.F	Ex vivo	-1 wk	11.44	54.237	8.8	Pool 2	Index 1	ATCACG
50	6644	9.5.F	Ex vivo	+1 wk	4.72	22.3775	9	Pool 2	Index 2	CGATGT
51	6644	9.6.F	Ex vivo	+2 wk	12.16	57.6506	8.9	Pool 2	Index 3	TTAGGC
52	6644	9.7.F	Ex vivo	+6 wk	8.21	38.9236	9	Pool 2	Index 4	TGACCA
53	6644	9.8.F	Ex vivo	+10 wk	17.62	83.5364	8.7	Pool 2	Index 5	ACAGTG
54	6644	9.9.F	Ex vivo	+12 wk	14.36	68.0808	8.7	Pool 2	Index 6	GCCAAT
55	6698	10.3.F	Ex vivo	-1 wk	8.16	38.6866	9.4	Pool 2	Index 7	CAGATC
56	6698	10.5.F	Ex vivo	+1 wk	9.36	44.3758	9.3	Pool 2	Index 8	ACTTGA
57	6698	10.6.F	Ex vivo	+2 wk	15.33	72.6795	9	Pool 2	Index 9	GATCAG
58	6698	10.7.F	Ex vivo	+6 wk	12.97	61.4908	9.4	Pool 2	Index 10	TAGCTT
59	6698	10.8.F	Ex vivo	+10 wk	11.92	56.5127	9.3	Pool 2	Index 11	GGCTAC
60	6698	10.9.F	Ex vivo	+12 wk	9.04	42.8586	9.3	Pool 2	Index 12	CTTGTA
			Mean (n = 52 RNA-seq libraries)		8.95365	42.4493	8.98462

## Sheet: Table S2
Table S2: Filtering and mapping statistics for 52 RNA-seq libraries from the animal infection time course experiment (-1 wk pre-infection and +1 wk, +2 wk, +6 wk, +10 wk and +12 wk post infection)
Sample number	Animal identifier	Lab code	Experimental group	Infection time point	No. reads pre-filtering	No. reads post-filtering (input)	% reads post-filtering	No. uniquely mapped reads	% uniquely mapped reads	Mean mapped length	No. reads mapped to multiple loci	% reads mapped to multiple loci	No. unmapped reads	% unmapped reads	No. reads mapped to annotated regions	% reads mapped to annotated regions	No. unassigned and ambiguous reads	% unassigned and ambiguous reads	Comments
1	6511	1.2.F	Ex vivo	-1 wk	18176987	14933559	0.821564	13695406	0.917089	195.26	655864	0.0439188	582289	0.038992	8284135	0.604884	5411271	0.395116
2	6511	1.3.F	Ex vivo	+1 wk	22121909	17356542	0.784586	15743455	0.907062	194.46	772688	0.0445185	840399	0.0484197	9830932	0.624446	5912523	0.375554
3	6511	1.4.F	Ex vivo	+2 wk	20195372	16613458	0.822637	15151395	0.911995	195.17	760420	0.0457713	701643	0.0422334	9979320	0.65864	5172075	0.34136
4	6511	1.5.F	Ex vivo	+6 wk	23204344	18665969	0.804417	16976142	0.90947	194.84	824860	0.0441906	864967	0.0463392	10885847	0.641244	6090295	0.358756
5	6511	1.6.F	Ex vivo	+10 wk	19964973	16417001	0.82229	15044281	0.916384	195.29	707436	0.0430917	665284	0.0405241	9401688	0.624934	5642593	0.375066
6	6511	1.7.F	Ex vivo	+12 wk	22439695	17808185	0.793602	16145046	0.906608	194.67	874071	0.0490825	789068	0.0443093	10391650	0.643643	5753396	0.356357
7	6514	2.2.F	Ex vivo	-1 wk	21676854	17210766	0.79397	15458811	0.898206	194.12	862997	0.0501429	888958	0.0516513	10027019	0.648628	5431792	0.351372
8	6514	2.3.F	Ex vivo	+1 wk	23134889	19235863	0.831466	17545755	0.912138	195.18	851074	0.0442441	839034	0.0436182	11043185	0.629394	6502570	0.370606
9	6514	2.4.F	Ex vivo	+2 wk	20938949	17287791	0.825628	15816496	0.914894	195.39	770951	0.0445951	700344	0.0405109	10520313	0.665148	5296183	0.334852
10	6514	2.5.F	Ex vivo	+6 wk	20015406	15900173	0.794397	14237849	0.895452	195.12	930239	0.058505	732085	0.0460426	9442218	0.663177	4795631	0.336823
11	6514	2.6.F	Ex vivo	+10 wk	20085794	16392386	0.816118	15015150	0.915983	195.13	661833	0.0403744	715403	0.0436424	9144338	0.609007	5870812	0.390993
12	6514	2.7.F	Ex vivo	+12 wk	21272919	17284241	0.8125	15657498	0.905883	195.44	900873	0.0521211	725870	0.0419961	10470225	0.668704	5187273	0.331296
13	6520	3.2.F	Ex vivo	-1 wk	21387448	17253174	0.806696	15688722	0.909324	195.03	802766	0.0465286	761686	0.0441476	10368135	0.660865	5320587	0.339135
14	6520	3.3.F	Ex vivo	+1 wk	20752997	17265991	0.831976	15748854	0.912131	195.6	839974	0.048649	677163	0.0392195	10522037	0.668114	5226817	0.331886
15	6520	3.4.F	Ex vivo	+2 wk	---	---	---	---	---	---	---	---	---	---	---	---	---	---	Did not have measurable quantities of RNA
16	6520	3.5.F	Ex vivo	+6 wk	23263946	19131778	0.822379	17451654	0.912182	194.97	850640	0.0444622	829484	0.0433563	11010539	0.630917	6441115	0.369083
17	6520	3.6.F	Ex vivo	+10 wk	19215681	15912725	0.828111	14569602	0.915594	195.68	737317	0.0463351	605806	0.0380705	9760598	0.669929	4809004	0.330071
18	6520	3.7.F	Ex vivo	+12 wk	18278185	15206275	0.831936	14003217	0.920884	195.95	639081	0.0420275	563977	0.0370884	8690332	0.620595	5312885	0.379405
19	6522	4.2.F	Ex vivo	-1 wk	19964971	15510926	0.776907	13613479	0.87767	195.33	1095786	0.0706461	801661	0.0516836	9397128	0.690281	4216351	0.309719	Removed from analysis
20	6522	4.3.F	Ex vivo	+1 wk	19346755	15503486	0.801348	14045179	0.905937	195.02	741088	0.0478014	717219	0.0462618	9386059	0.668276	4659120	0.331724	Removed from analysis
21	6522	4.4.F	Ex vivo	+2 wk	---	---	---	---	---	---	---	---	---	---	---	---	---	---	Did not have measurable quantities of RNA
22	6522	4.5.F	Ex vivo	+6 wk	19972862	16347779	0.8185	15005040	0.917864	195.8	719055	0.0439849	623684	0.038151	9841823	0.655901	5163217	0.344099	Removed from analysis
23	6522	4.6.F	Ex vivo	+10 wk	16754508	14026885	0.837201	12960575	0.923981	196.16	623054	0.0444186	443256	0.0316005	8638314	0.666507	4322261	0.333493	Removed from analysis
24	6522	4.7.F	Ex vivo	+12 wk	21127750	16796217	0.794984	15198090	0.904852	195	816622	0.0486194	781505	0.0465286	9628120	0.633509	5569970	0.366491	Removed from analysis
25	6526	5.2.F	Ex vivo	-1 wk	22466608	18154324	0.808058	16499108	0.908825	195.03	818974	0.0451118	836242	0.046063	10102698	0.612318	6396410	0.387682
26	6526	5.3.F	Ex vivo	+1 wk	20354572	16925550	0.831536	15498557	0.91569	195.61	777664	0.0459462	649329	0.0383638	9950225	0.64201	5548332	0.35799
27	6526	5.4.F	Ex vivo	+2 wk	---	---	---	---	---	---	---	---	---	---	---	---	---	---	Did not have measurable quantities of RNA
28	6526	5.5.F	Ex vivo	+6 wk	18802427	15659631	0.832852	14445657	0.922477	195.98	663917	0.0423967	550057	0.0351258	9002465	0.623195	5443192	0.376805
29	6526	5.6.F	Ex vivo	+10 wk	20210549	16983187	0.840313	15731978	0.926327	196.15	676140	0.0398123	575069	0.0338611	9468858	0.601886	6263120	0.398114
30	6526	5.7.F	Ex vivo	+12 wk	17839802	15032517	0.842639	13870136	0.922676	196.21	687494	0.0457338	474887	0.0315907	8581547	0.618707	5288589	0.381293
31	6635	6.3.F	Ex vivo	-1 wk	20775543	17512092	0.842919	16150578	0.922253	196.08	727553	0.0415458	633961	0.0362013	9516719	0.589249	6633859	0.410751
32	6635	6.5.F	Ex vivo	+1 wk	19842362	16080709	0.810423	14755499	0.91759	195.57	701074	0.0435972	624136	0.0388127	8690819	0.588988	6064680	0.411012
33	6635	6.6.F	Ex vivo	+2 wk	19684743	16282109	0.827144	14920524	0.916375	195.8	725211	0.0445404	636374	0.0390842	8533124	0.571905	6387400	0.428095
34	6635	6.7.F	Ex vivo	+6 wk	18390732	15359067	0.835153	14197437	0.924368	195.91	609936	0.0397118	551694	0.0359198	8144377	0.573651	6053060	0.426349
35	6635	6.8.F	Ex vivo	+10 wk	21835794	18156619	0.831507	16789159	0.924685	195.95	689049	0.0379503	678411	0.0373644	9207120	0.548397	7582039	0.451603
36	6635	6.9.F	Ex vivo	+12 wk	22897530	19141210	0.835951	17619800	0.920517	195.79	819764	0.0428272	701646	0.0366563	10573278	0.600079	7046522	0.399921
37	6636	7.3.F	Ex vivo	-1 wk	18794839	15655217	0.832953	14456538	0.923433	195.94	685545	0.0437902	513134	0.0327772	9193427	0.635936	5263111	0.364064
38	6636	7.5.F	Ex vivo	+1 wk	13072651	10862727	0.830951	10084613	0.928368	196.66	467848	0.0430691	310266	0.0285624	6700904	0.664468	3383709	0.335532
39	6636	7.6.F	Ex vivo	+2 wk	21446041	17348545	0.808939	15771446	0.909093	194.73	742228	0.0427833	834871	0.0481234	9527753	0.604114	6243693	0.395886
40	6636	7.7.F	Ex vivo	+6 wk	20525331	16960232	0.826307	15504458	0.914165	195.4	773405	0.0456011	682369	0.0402335	9979237	0.643637	5525221	0.356363
41	6636	7.8.F	Ex vivo	+10 wk	19279474	16159048	0.838148	14964857	0.926098	196.09	619520	0.0383389	574671	0.0355634	9115598	0.609134	5849259	0.390866
42	6636	7.9.F	Ex vivo	+12 wk	20624712	16982108	0.823386	15456012	0.910135	195.23	819325	0.0482464	706771	0.0416186	10148496	0.656605	5307516	0.343395
43	6637	8.3.F	Ex vivo	-1 wk	16988943	14405270	0.84792	13448856	0.933607	196.68	594116	0.041243	362298	0.0251504	9145436	0.680016	4303420	0.319984
44	6637	8.5.F	Ex vivo	+1 wk	23356440	19085001	0.817119	17422027	0.912865	195.21	893808	0.046833	769166	0.0403021	11435844	0.656401	5986183	0.343599
45	6637	8.6.F	Ex vivo	+2 wk	27864959	22585615	0.810538	19432478	0.860392	194.69	1822436	0.0806901	1330701	0.0589181	12243667	0.630062	7188811	0.369938
46	6637	8.7.F	Ex vivo	+6 wk	17252132	14466469	0.838532	13442744	0.929235	196.44	618778	0.0427733	404947	0.0279921	8694960	0.646814	4747784	0.353186
47	6637	8.8.F	Ex vivo	+10 wk	21864119	18107047	0.828163	16711325	0.922918	195.68	701123	0.038721	694599	0.0383607	9866375	0.590401	6844950	0.409599
48	6637	8.9.F	Ex vivo	+12 wk	12612261	10548330	0.836355	9840005	0.93285	196.9	463856	0.0439744	244469	0.0231761	6389165	0.649305	3450840	0.350695
49	6644	9.3.F	Ex vivo	-1 wk	22838456	18699289	0.818763	17163650	0.917877	195.51	856113	0.0457832	679526	0.0363397	11327651	0.659979	5835999	0.340021
50	6644	9.5.F	Ex vivo	+1 wk	20403768	15718214	0.770358	13539964	0.861419	193.81	1208146	0.0768628	970104	0.0617185	8942335	0.66044	4597629	0.33956
51	6644	9.6.F	Ex vivo	+2 wk	22927551	18393780	0.802257	16842652	0.915671	195.19	808187	0.0439381	742941	0.0403909	10965604	0.651062	5877048	0.348938
52	6644	9.7.F	Ex vivo	+6 wk	18918669	15569225	0.822956	14424708	0.926489	196.36	696515	0.0447367	448002	0.0287748	9473774	0.656774	4950934	0.343226
53	6644	9.8.F	Ex vivo	+10 wk	25124819	20639263	0.821469	18945080	0.917915	195.61	815388	0.0395066	878795	0.0425788	11274524	0.595116	7670556	0.404884
54	6644	9.9.F	Ex vivo	+12 wk	21557629	17777525	0.824651	16438299	0.924667	196.32	847682	0.0476828	491544	0.0276497	10783319	0.655988	5654980	0.344012
55	6698	10.3.F	Ex vivo	-1 wk	21889178	17763195	0.811506	16298050	0.917518	195.46	781981	0.0440225	683164	0.0384595	10454467	0.641455	5843583	0.358545
56	6698	10.5.F	Ex vivo	+1 wk	22516799	18247711	0.810404	16716051	0.916063	195.52	869581	0.0476543	662079	0.0362829	11148037	0.666906	5568014	0.333094
57	6698	10.6.F	Ex vivo	+2 wk	23699174	19146602	0.807902	17632973	0.920945	195.55	796483	0.0415992	717146	0.0374555	10889236	0.61755	6743737	0.38245
58	6698	10.7.F	Ex vivo	+6 wk	22228750	18220254	0.819671	16894631	0.927245	196.13	780940	0.0428611	544683	0.0298944	10537267	0.623705	6357364	0.376295
59	6698	10.8.F	Ex vivo	+10 wk	20310515	16294780	0.802283	15027119	0.922204	195.63	609011	0.0373746	658650	0.0404209	8597778	0.572151	6429341	0.427849
60	6698	10.9.F	Ex vivo	+12 wk	18027556	14920302	0.827639	13878133	0.930151	196.64	636121	0.0426346	406048	0.0272145	8595962	0.619389	5282171	0.380611
				Mean	2.06414e+07	1.69177e+07	0.820422	1.54762e+07	0.915469	195.553	774000	0.0455471	667427	0.0389839	9.74951e+06	0.630578	5.72673e+06	0.369422
				Stand. Dev.	2.58846e+06	2.02122e+06	0.0158382	1.76573e+06	0.0136478	0.64569	191566	0.00765895	178632	0.00752518	1.1432e+06	0.0306952	862706	0.0306952
				Median	2.06889e+07	1.7097e+07	0.822796	15580978	0.916737	195.56	771820	0.0441066	678968	0.0389023	9.84865e+06	0.633426	5704188	0.366574
				Minimum	12612261	10548330	0.770358	9840005	0.860392	193.81	463856	0.0373746	244469	0.0231761	6389165	0.548397	3383709	0.319984
				Maximum	27864959	22585615	0.84792	19432478	0.933607	196.9	1822436	0.0806901	1330701	0.0617185	12243667	0.680016	7670556	0.451603
